# Supplementary material for: Fibroblast growth factor receptor splice variants are stable markers of oncogenic transforming growth factor β1 signaling in metastatic breast cancers
Source: PubMed Central journal article supplement (PMC4053226; doi:10.1186/bcr3623), 2014-03-11
Supplement: bcr3623-S1.pdf [file bcr3623-S1.pdf]

**Table S1**

| <b>Target</b>             | <b>Application</b>             | <b>Sequence (5' to 3')</b>   |
|---------------------------|--------------------------------|------------------------------|
| GAPDH                     | Real Time PCR-Sense            | 5'-CAACTTTGGCATTGTGGAAGGGCTC |
| GAPDH                     | Real Time PCR-Antisense        | 5'-GCAGGGATGATGTTCTGGGCAGC   |
| hFGFR1                    | Real Time PCR-Sense            | 5'-CGCCCTGTACCTGGAGATCATCA   |
| hFGFR1                    | Real Time PCR-Antisense        | 5'-TTGGTACCACTCTTCATCTT      |
| hFGFR2                    | Real Time PCR-Sense            | 5'-GCCTGGAAGAGAAAGGAGATTAC   |
| hFGFR2                    | Real Time PCR-Antisense        | 5'-GGATGACTGTTACCACCATACA    |
| hFGFR3                    | Real Time PCR-Sense            | 5'-CTCGCGCTCTGCGTGGCCGT      |
| hFGFR3                    | Real Time PCR-Antisense        | 5'-TTCTTGTCCATCCGCTCGGG      |
| hFGFR4                    | Real Time PCR-Sense            | 5'-GATGGACAGGCCTTTCATGGG     |
| hFGFR4                    | Real Time PCR-Antisense        | 5'-TGCTGCGGTCCATGTGGGGTCCTC  |
| mFGFR1                    | Real Time PCR-Sense            | 5'-CACCGCTCTACCTGGAGATCATTA  |
| mFGFR1                    | Real Time and RT PCR-Antisense | 5'-TTGGTGCCGCTCTTCATCTT      |
| mFGFR2                    | Real Time PCR-Sense            | 5'-GCCTGTGAGAGAGAAGGAGATCAC  |
| mFGFR2                    | Real Time and RT PCR-Antisense | 5'-AGATGACTGTCACCACCATGCA    |
| mFGFR3                    | Real Time PCR-Sense            | 5'-CTAGTGTTCTGCGTGGCGGT      |
| mFGFR3                    | Real Time PCR-Antisense        | 5'-TTCTTATCCATTCGCTCCGG      |
| mFGFR4                    | Real Time PCR-Sense            | 5'-CTGTTGAGCATCTTTCAGGG      |
| mFGFR4                    | Real Time PCR-Antisense        | 5'-CGTGGAAGGCCTGTCCATCC      |
| mFGFR1-<br>iiib           | RT-PCR-Sense                   | 5'-CGGGAATTAATAGCTCGGATGC    |
| mFGFR1-<br>iiic           | RT-PCR-Sense                   | 5'-GGAGTTAATACCACCGACAAA     |
| mFGFR2-<br>iiib           | RT-PCR-Sense                   | 5'-CACTCGGGGATAAATAGCTCC     |
| mFGFR2-<br>iiic           | RT-PCR-Sense                   | 5'-CGGTGTTAACACCACGGAC       |
| mFGFR1-<br>$\alpha/\beta$ | RT-PCR-Sense                   | 5'-TTCTGGGCTGTGCTGGTCAC      |

|                           |                            |                                                                              |
|---------------------------|----------------------------|------------------------------------------------------------------------------|
| mFGFR1-<br>$\alpha/\beta$ | RT-PCR-<br>Antisense       | 5'- GCGAACCTTGTAGCCTCCAA                                                     |
| mFGFR2-<br>$\alpha/\beta$ | RT-PCR-Sense               | 5'- TTCATCTGCCTGGTCTTGGT                                                     |
| mFGFR2-<br>$\alpha/\beta$ | RT-PCR-<br>Antisense       | 5'- AATAAGGCTCCAGTGCTGGTTTC                                                  |
| mAREG                     | Real Time<br>PCR-Sense     | 5'- CAGGGGACTACGACTACTCAGA                                                   |
| mAREG                     | Real Time<br>PCR-Antisense | 5'- GATAACGATGCCGATGCCAATA                                                   |
| mBTC                      | Real Time<br>PCR-Sense     | 5'- GCATTACTGCATCCATGGGAG                                                    |
| mBTC                      | Real Time<br>PCR-Antisense | 5'- GCTTGCCACCAGCTTGTGATA                                                    |
| mEREG                     | Real Time<br>PCR-Sense     | 5'- GGAATTCTGACGCTGCTTTGTCTAGGTT                                             |
| mEREG                     | Real Time<br>PCR-Antisense | 5'- CAAGCTTTATGCATCCAGCGGTTATGAT                                             |
| mFGFR1                    | shRNA#1                    | <u>CCGGCCTTGCCTCTAAGAAGTGTATACTCGAGTATACACTTCT</u><br><u>TAGAGGCAAGTTTTT</u> |
| mFGFR1                    | shRNA#2                    | <u>CCGGCCTGGAGCATCATAATGGATTCTCGAGAATCCATTATG</u><br><u>ATGCTCCAGGTTTTT</u>  |
| mFGFR1                    | shRNA#3                    | <u>CCGGCGAGGATAACGTAATGAAGATCTCGAGATCTTCATTAC</u><br><u>GTTATCCTCGTTTTT</u>  |

Underlined text denotes complimentary RNA-targeted sequence, while **bold text** denotes hairpin sequence.
