# Supplementary material for: Fibroblast growth factor receptor splice variants are stable markers of oncogenic transforming growth factor β1 signaling in metastatic breast cancers
Source: PubMed Central journal article supplement (PMC4053226; doi:10.1186/bcr3623), 2014-03-11
Supplement: bcr3623-S3.pdf [file bcr3623-S3.pdf]

**Table S3**

| <b>Antibody</b>          | <b>Dilution</b>                        | <b>Supplier (Catalogue #)</b>        |
|--------------------------|----------------------------------------|--------------------------------------|
| E-Cadherin               | 1:5000                                 | BD Biosciences (610182)              |
| $\beta$ 3 Integrin       | 1:1000                                 | Cell Signaling Technologies (4702)   |
| $\beta$ 1 Integrin       | 1:1000                                 | Cell Signaling Technologies (4706)   |
| EGFR                     | 1:1000                                 | Cell Signaling Technologies (2646)   |
| EGFR1 for flow cytometry | 1:50                                   | Harlan Laboratories (custom)         |
| Total-Erk1/2             | 1:2000                                 | Cell Signaling Technologies (4695)   |
| $\beta$ -actin           | 1:1000                                 | Santa Cruz Biotechnologies (sc-1616) |
| ER- $\alpha$             | 1:1000 for Immunoblot<br>1:100 for IHC | Santa Cruz Biotechnologies (sc-542)  |
| Fibronectin              | 1:2000 for Immunoblot<br>1:100 for IHC | BD Biosciences (610077)              |
| FGFR1                    | 1:100 for IHC                          | Santa Cruz Biotechnologies (sc-121)  |
| Phospho-Erk1/2           | 1:2000 for Immunoblot<br>1:100 for IHC | Cell Signaling Technologies (9101)   |
