# Supplementary material for: Fibroblast growth factor receptor splice variants are stable markers of oncogenic transforming growth factor β1 signaling in metastatic breast cancers
Source: PubMed Central journal article supplement (PMC4053226; doi:10.1186/bcr3623), 2014-03-11
Supplement: bcr3623-S7.pdf [file bcr3623-S7.pdf]

Table S4

|                                          | <u>FGFR1</u>   | <u>FGFR2</u>   | <u>FGFR3</u>   | <u>FGFR4</u>   |
|------------------------------------------|----------------|----------------|----------------|----------------|
| <b>Fold Regulation<br/>(+/- SE) n=20</b> | 7.96(+/- 2.87) | 8.06(+/- 2.86) | 6.77(+/- 3.20) | 7.75(+/- 3.10) |

**Supplemental Table 2.** FGFR expression is increased in BC tumors as compared to matched normal tissues. Twenty BC tumor biopsies were analyzed by RT-PCR for expression of FGFRs 1-4 whose expression levels were normalized against RNA gathered from adjacent normal tissues. Data shown are the mean-fold increases (+SE) in FGFR levels as compared to the matched normal tissue.
